# Supplementary material for: Oligoethylenimine grafted PEGylated poly(aspartic acid) as a macromolecular contrast agent: properties and in vivo studies
Source: Royal Society of Chemistry journal article supplement (doi:10.1039/c6tb00278a), 2016-01-01
Supplement: c6tb00278a1.pdf [file c6tb00278a1.pdf]

## Supporting Information

### **Oligoethylenimine grafted PEGylated Poly(aspartic acid) as Macromolecular Contrast Agents: Properties and in vivo Studies**

Bin Jiang,<sup>ab#</sup> Min Liu,<sup>a#</sup> Kunchi Zhang,<sup>a</sup> Guangyue Zu,<sup>a</sup> Jingjin Dong,<sup>a</sup> Yi Cao,<sup>a</sup> Lan Zhang,<sup>b</sup> and  
Renjun Pei<sup>\*a</sup>

<sup>a</sup>Key Laboratory of Nano-Bio Interface, Division of Nanobiomedicine, Suzhou  
Institute of Nano-Tech and Nano-Bionics, Chinese Academy of Sciences, Suzhou  
215123, China.

<sup>b</sup>School of Materials Science and Engineering, Xi'an Jiaotong University, Xi'an  
710049, China.

Electronic Supplementary Information (ESI) available. See DOI:  
10.1039/x0xx00000x

# These authors contributed equally to this work.

Electronic supplementary information (ESI) available: H&E staining for major organs

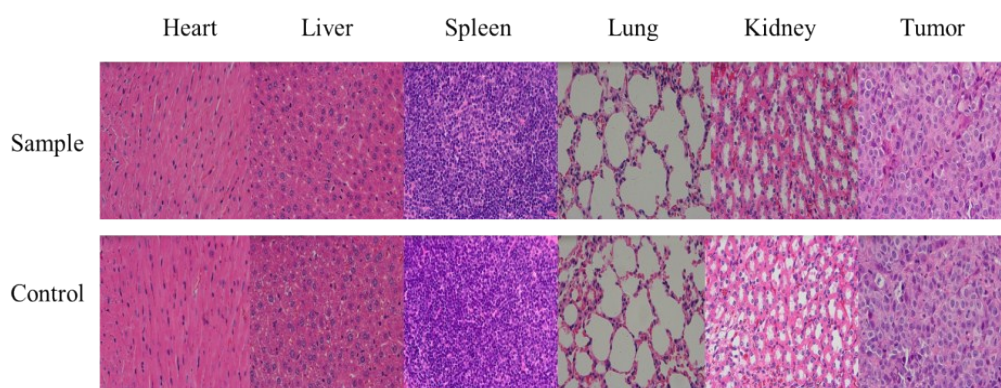

Fig. S1 H&E staining for major organs (including heart, liver, spleen, lung, kidney and tumor).

mCA treated mice were sacrificed on the 2th day after injection with the dose of  $Gd^{3+}$  (0.1 mmol/kg). Age-matched healthy mice treated with PBS were used as control.
